# Supplementary material for: Biochemical and structural characterization of a DNA N6-adenine methyltransferase from Helicobacter pylori
Source: PubMed Central journal article supplement (PMC5173035; doi:10.18632/oncotarget.9692), 2016-05-29
Supplement: oncotarget-07-40965-s001.pdf [file oncotarget-07-40965-s001.pdf]

## Biochemical and structural characterization of a DNA N<sup>6</sup>-adenine methyltransferase from *Helicobacter pylori*

### Supplementary Material

**Table S1. Residues of the asymmetric unit**

|                          | Number of residues | Residues not visible in the structure  |
|--------------------------|--------------------|----------------------------------------|
| M1.HpyAVI Chain A        | 197                | 34-57, 160-170                         |
| M1.HpyAVI Chain B        | 185                | 32-58, 116, 154, 156-172, 232          |
| M1.HpyAVI Chain C        | 185                | 32-61, 114, 157-171, 232               |
| M1.HpyAVI Chain D        | 177                | 32-60, 111-117, 147, 149, 156-171, 232 |
| M1.HpyAVI-AdoMet Chain A | 201                | 33-58, 169-172, 232                    |
| M1.HpyAVI-AdoMet Chain B | 194                | 32-58, 157-164, 230-232                |
| M1.HpyAVI-AdoMet Chain C | 204                | 32-56, 159-160, 232                    |
| M1.HpyAVI-AdoMet Chain D | 188                | 32-59, 158-172, 232                    |
| M1.HpyAVI-AdoMet Chain E | 193                | 32-58, 158-167, 231-232                |
| M1.HpyAVI-AdoMet Chain F | 194                | 32-58, 159-168, 232                    |
| M1.HpyAVI-AdoMet Chain G | 200                | 33-56, 159-163, 230-232                |
| M1.HpyAVI-AdoMet Chain H | 193                | 32-58, 159-168, 231-232                |

**Table S2. Duplex DNA sequences used in the methyl transfer reaction**

| Duplex                   | Sequence (5' - to 3')                                                                                                                                                                                                        |
|--------------------------|------------------------------------------------------------------------------------------------------------------------------------------------------------------------------------------------------------------------------|
| GAGG-1 <sup>a</sup>      | CATTTATCAGGGTTATTGTCTCATGAGCGGATACATATTTGAATGTATTTAGAAAAATAAACAAATA<br>GGGGTTCCGCGCACATTTCCCCGAAAAGTGCCACCTGACGTCTAAGAAACCATTATTATCATGACAT<br>TAACCTATAAAAAATAGGCGTATCAC <u>GAGG</u> CCCTTTCGTC                              |
| GAGG-2 <sup>a</sup>      | CTATTACGCCAGCTGGCGAAAGGGGATGTGTGCAAGGCGATTAAGTTGGGTAACGCCAGGGTTTT<br>CCCAGTCACGACGTTGTAAAACGACGGCCAGTGAATTCGAGCTCGGTACCCGGGGAT <u>CCTCT</u> AGAGT<br>CGACCTGCAGGCATGCAAGCTTGGCGTAATCATGGTCATAGCTGTTCCGTGTGAAATTGTTATCCG      |
| GAAG-1 <sup>b</sup>      | TAGAGTCGACCTGCAGGCATGCAAGCTTGGCGTAATCATGGTCATAGCTGTTCCGTGTGAAATGT<br>TATCCGCTCACAATCCACACAACATACGAGCCG <u>GAAG</u> CATAAAGTGTAAGCCTGGGGTGCCTAAT<br>GAGTGAGCTAACTCACATTAATTGCGTTGCGCTCACTGCCCGCTTCCAGTCGGGAAACCTGTCGTGC       |
| GAAG-2 <sup>b</sup>      | CGTTGTC <u>GAAG</u> TAAGTTGGCCGAGTGTTATCACTCATGGTTATGGCAGCACTGCATAAATTCTCTTA<br>CTGTTCATGCCATCCGTAAGATGCTTTTCTGTGACTGGTGAGTACTCAACCAAGTCATTCTGAGAATAG<br>TGTATGCGGCGACCGAGTTGCTCTTGCCCGGCGTCAATACGGGATAATACCGCGCCACATAGCAGAA |
| GGAG-1 <sup>c</sup>      | GTGGCGCTTTCTCAATGCTCACGCTGTAGGTATCTCAGTTCGGTGTAGGTGCTTCG <u>CTCCA</u> AGCTGGG<br>CTGTGTGCACGAACCCCCGTTCCAGCCGACCGCTGCGCCTTATCCGGTAACTATCGTCTTGAGTCCA<br>ACCCGGTAAGACACGACTTATCGCCACTGGCAGCAGCCACTGGTAACAGGATTAGCAGAG         |
| GGAG-2 <sup>c</sup>      | AGAAATTCTTTCATCTCTTTCCGGCGGCTGGTAACCCGGAACAAGTGCCATTGCTCAGCACAACCTGC<br><u>CGGAG</u> TACCGCTAACGCCAAGCTGGACGCCAAGTGCGTAATGGTCGGCAATATCCACGTCGCAACT<br>GGCTGGTGCAGCGCTTTTACCTGCCATCACATCATCAAACGCTTTGTTTTTATCTTTCGCACACCAGA   |
| N-Control-1 <sup>d</sup> | TAAGTTGGCCGAGTGTTATCACTCATGGTTATGGCAGCACTGCATAAATTCTTACTGTCATGCCAT<br>CCGTAAGATGCTTTTCTGTGACTGGTGAGTACTCAACCAAGTCATTCTGAGAATAGTGTATGCGGCG<br>ACCGAGTTGCTCTTGCCCGGCGTCAATACGGGATAATACCGCGCCACATAGCAGAACTTTAAAAGTG             |
| N-Control-2 <sup>d</sup> | ATTACAGAAACGGCTTTTCAAAAATATGGTATTGATAATCCTGATATGAATAAATTGCAGTTTCATT<br>TGATGCTCGATGAGTTTTTCTAAGAATTAATTCATGAGCGGATACATATTTGAATGTATTTAGAAAAA<br>TAAACAAATAGGGGTTCCGCGCACATTTCCCCGAAAAGTGCCACCTGAAATTGTAACGTTAATATT            |

<sup>a</sup> DNA substrates that contain 5'-GAGG-3' sequence; <sup>b</sup> DNA substrates that contain 5'-GAAG-3' sequence; <sup>c</sup> DNA substrates that contain 5'-GGAG-3' sequence; <sup>d</sup> DNA substrates that used as negative control.



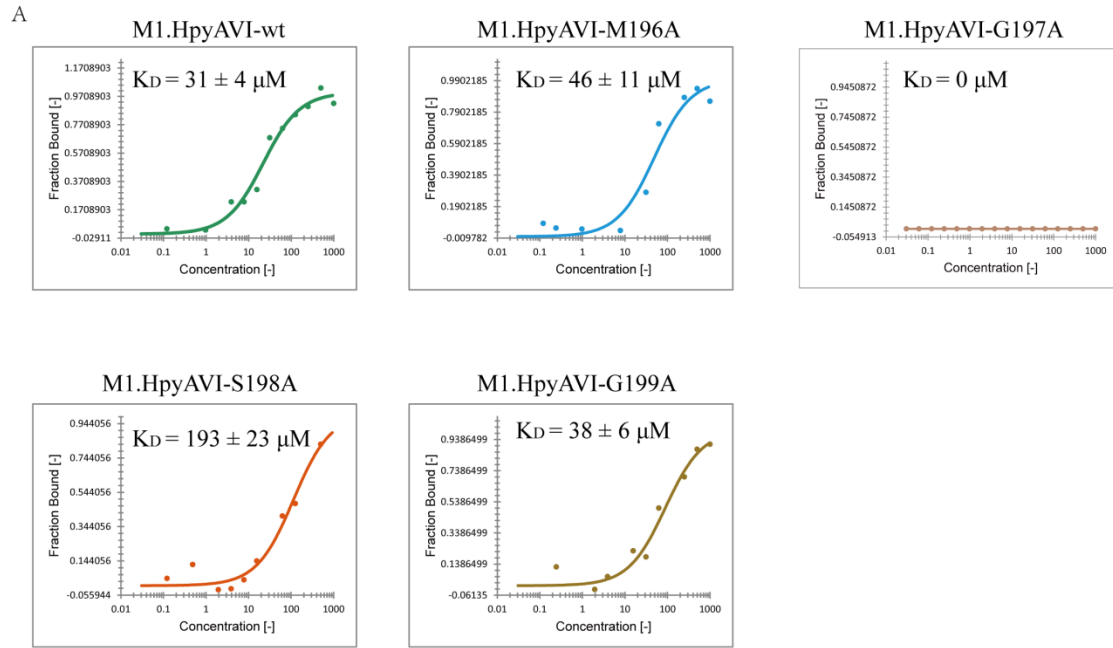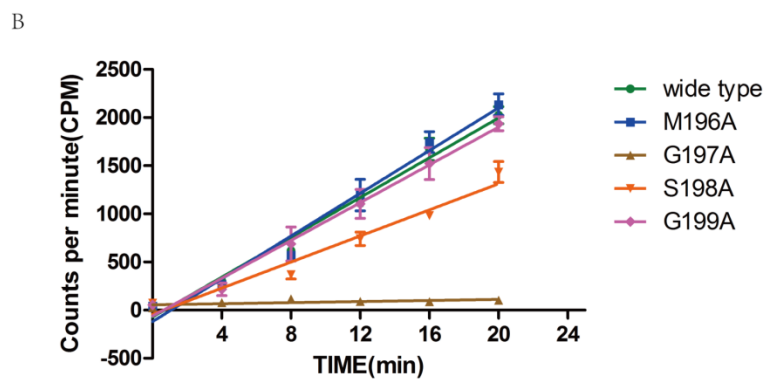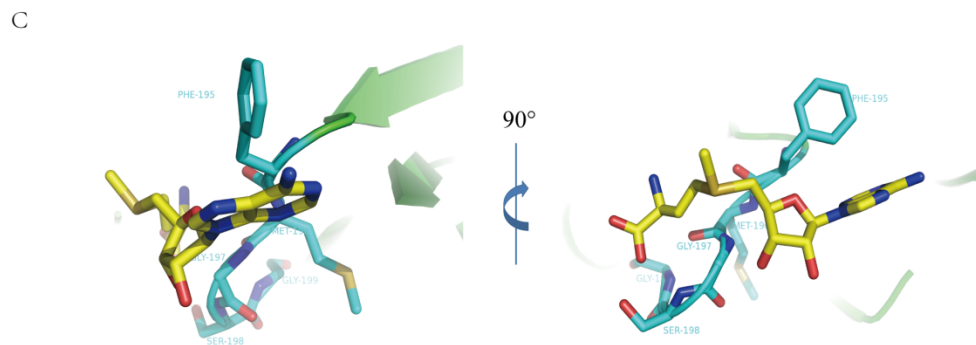

**Figure S2. Structural and biochemical analyses of the conserved domain “FMGSG” for AdoMet binding**

A. Cofactor binding affinity of wt-/mutants M1.HpyAVI proteins analyzed by microscale thermophoresis (MST). The binding affinity was determined between

fluorescently labelled M1.HpyAVI protein and unlabeled AdoMet. The bound fraction is shown on the y-axis against the protein concentration. AdoMet (15 nM to 1 mM) was titrated into a fixed concentration of M1.HpyAVI wt/mutant protein (800 nM). The dissociation constant ( $K_D$ ) is yielded according to the law of mass action from the isotherm derived of the raw data: M1.HpyAVI-wt:  $31 \pm 4 \mu\text{M}$ ; M1.HpyAVI-M196A :  $46 \pm 11 \mu\text{M}$ ; M1.HpyAVI-G197A :  $0 \mu\text{M}$ ; M1.HpyAVI-S198A :  $193 \pm 23 \mu\text{M}$ ; M1.HpyAVI-G199A :  $38 \pm 6 \mu\text{M}$ . Standard deviation for three replicates is indicated. Measurements were made with 40% LED and 40% laser power at 25°C. **B.** Methyl transfer activity of wide type protein and the mutants were quantified using radioactive assay. [ $^3\text{H}$ ]-methyl transferred to duplex DNA containing 5'-GAGG-3' was quantified by Beckman LS6500 for 10 min. Experiments were repeated for three times and data were corrected by subtraction of the background. **C.** Interaction of F195 and AdoMet in the cofactor-bound structure of M1.HpyAVI.

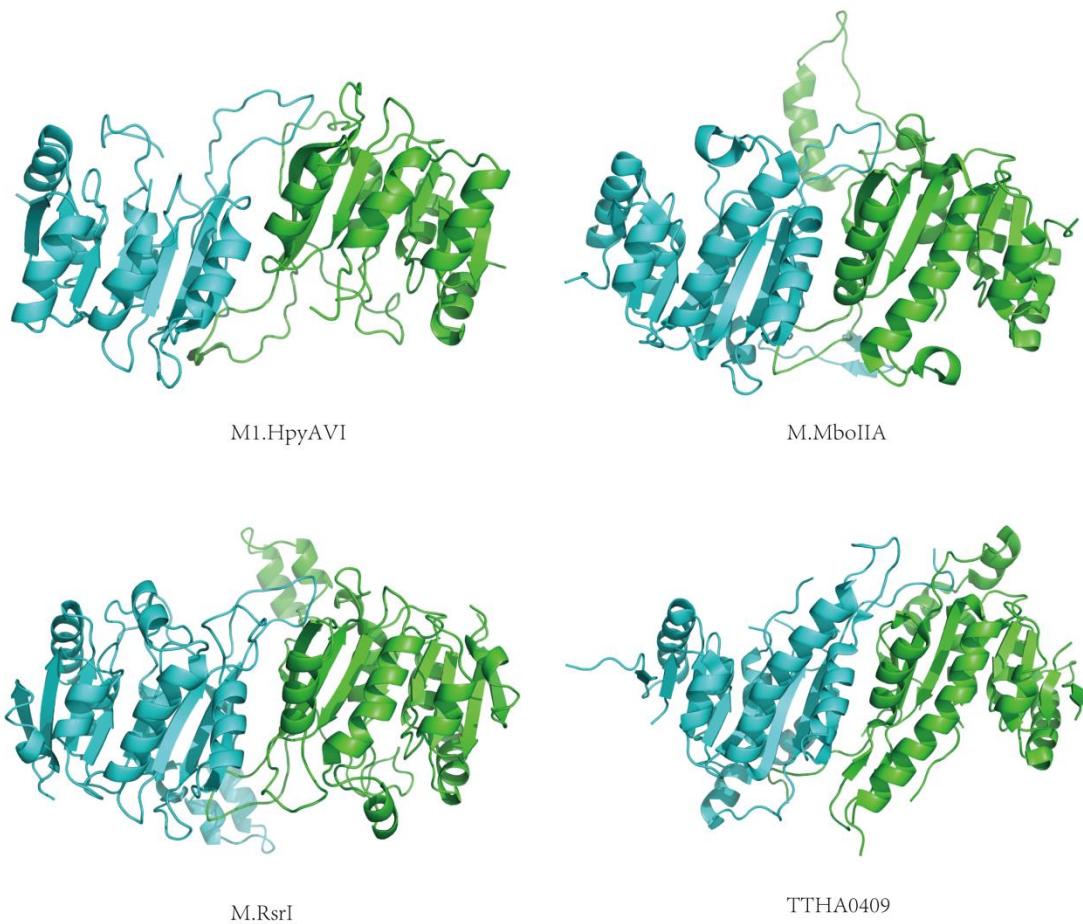

**Figure S3. Dimer organization of M1.HpyAVI, M.MboIIA, M.RsrI and TTHA0409**

The two monomers are marked in green and blue. The pictures were generated using *PyMol*.

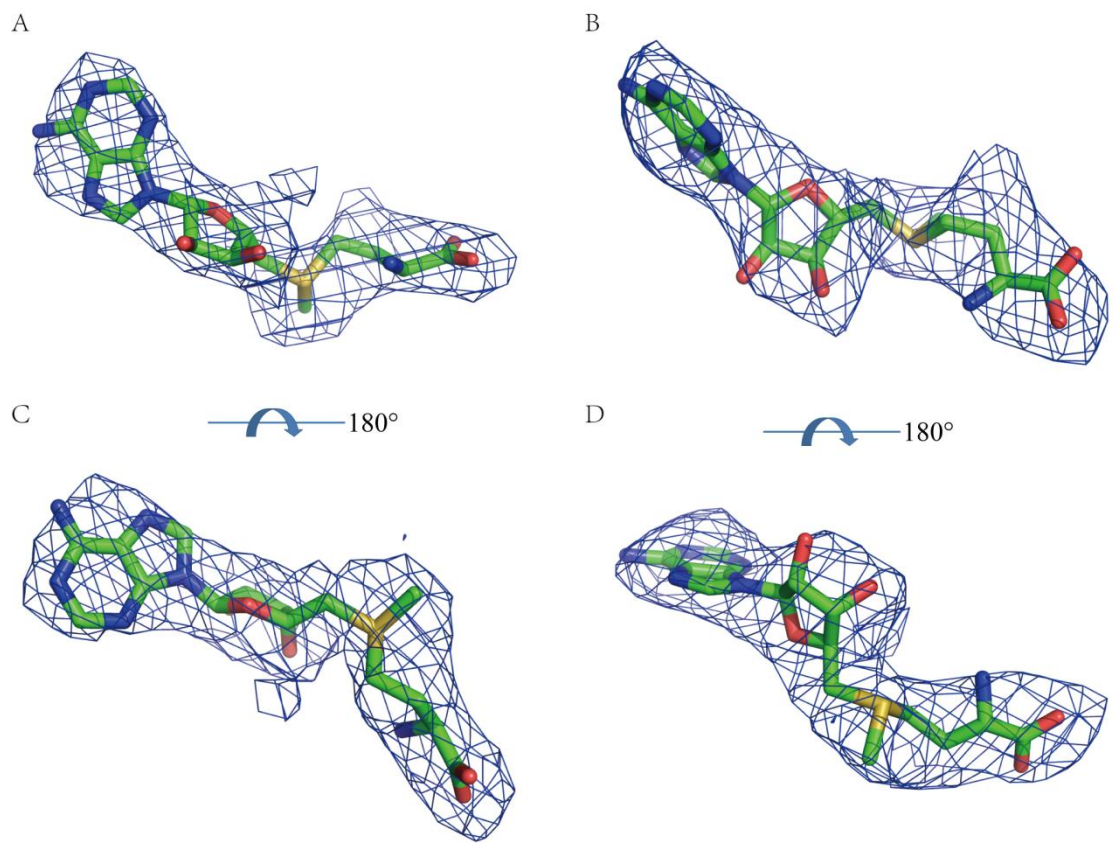

**Figure S4.**The *Fo-Fc* omit map of the AdoMet in the M1.HpyAVI binary complex structure.

The pictures were generated using *PyMol*.
